# Supplementary material for: Polymer-capped gold nanoparticles as nanozymes with improved catalytic activity for the monitoring of serum ciprofloxacin
Source: Royal Society of Chemistry journal article supplement (doi:10.1039/d2an00158f), 2022-01-01
Supplement: d2an00158f1.pdf [file d2an00158f1.pdf]

# Supporting information

## Polymer capped gold nanoparticles as nanozymes with improved catalytic activity for monitoring of serum ciprofloxacin

Cheng Cheng <sup>a,b</sup>, Juan Qiao <sup>a,c</sup>, Hongyi Zhang <sup>b</sup>, Zhenwen Zhao <sup>a,c</sup>, Li Qi \* <sup>a,c</sup>

<sup>a</sup> Beijing National Laboratory for Molecular Sciences; Key Laboratory of Analytical Chemistry for Living Biosystems, Institute of Chemistry, Chinese Academy of Sciences, Beijing 100190, P.R. China

<sup>b</sup> College of Chemistry & Environmental Science, Hebei University, Baoding 071002, P. R. China

<sup>c</sup> School of Chemical Sciences, University of Chinese Academy of Sciences, Beijing 100049, P. R. China

\* Correspondence author:

[qili@iccas.ac.cn](mailto:qili@iccas.ac.cn)

## Experiments

### **Materials and chemicals**

Ciprofloxacin (CIP) and 5,5'-dimethyl-1-pyrroline *N*-oxide (DMPO) was supplied ARK Pharm, Inc. (Shanghai, China). Acrylamide (AM) was gotten from Alfa Aesar Chemicals Co. Ltd. (Shanghai, China). Trithiocarbonate (DDAT) was obtained from Sigma-Aldrich Co. Ltd. (S. Lewis, MO, USA). HAuCl<sub>4</sub> was bought from Shenyang Jinke Reagent Factory (Shenyang, China). Sodium acetate (NaAc) was gotten from Beijing Yili Fine Chemicals Co., Ltd. (Beijing, China). Zinc sulfate (ZnSO<sub>4</sub>), magnesium chloride (MgCl<sub>2</sub>) and streptomycin (STR) were obtained from Aladdin Chemistry Company (Shanghai, China). Amino acids (Gly, L-Met, L-Pro, L-Arg, L-Ser, L-His, L-Val) were purchased from TCI Shanghai Co. Ltd. (Shanghai, China). Hydrogen peroxide (H<sub>2</sub>O<sub>2</sub>, 30.0%, w/w), 3,3',5,5'-tetramethylbenzidine (TMB), 2,2-azobisisobutyronitrile (AIBN), cetyltrimethylammonium chloride (CTAC), benzoquinone and other chemicals were purchased from Beijing Innochem Technology Co. Ltd. (Beijing, China). The aqueous solutions were prepared with Milli-Q water (Millipore, Bedford, MA, USA).

### **Instruments**

The ultraviolet-visible (UV-*vis*) absorption spectra were recorded using a TU-1900 UV-*vis* double-beam spectrometer (Purkinje General, China). A 1.0 mL capacity cuvette with a 1.0 cm path length was used for measuring the UV-*vis* absorbance.

Fourier transform infrared (FT-IR) spectra were recorded by an FT-IR spectrophotometer (TENSOR-27, Germany).

The zeta potentials of PAM-4@AuNPs, CIP and PAM-4@AuNPs-CIP were carried out with a Zetasizer laser particle analyzer (Zetasizer Nano ZS ZEN3600, British).

X-ray photoelectron spectroscopy (XPS) measurements were performed by an ESCALab220i-XL spectrometer (VG Scientific, U.K.).

Transmission electron microscopy (TEM) images were obtained using a transmission electron microscope (JEM-2010, Japan electron optics laboratory, Japan) at a voltage of 200 kV.

Electron paramagnetic resonance (EPR) signals were measured by a Bruker ESP 300E spectrometer (Bruker, Rheinstetten, Germany) with a microwave bridge (receiver gain, 1×10<sup>5</sup>; modulation amplitude, 2 Gauss; microwave power, 10 mW; modulation frequency, 100 kHz). A sample containing 0.5 M DMPO was transferred to a quartz capillary tube and placed in the EPR cavity. Under the UV-irradiation at 355 nm, EPR signals were detected using DMPO as the spin trap.

### **Preparation of poly(acrylamide) (PAM)**

All of the glasswares were washed with aqua regia (HCl : HNO<sub>3</sub> volume ratio = 3.0 : 1.0) and rinsed with ultrapure water. Typically, the PAM-1, PAM-2, PAM-3, PAM-4 and PAM-5 were prepared *via* reversible addition-fragmentation chain transfer polymerization (RAFT) method (Fig. S1A). Typically, 10.0 mM AM, 10.0 mg DDAT and 20.0 mg AIBN were added into 10.0 mL 1, 4-dioxane in a 20.0 mL-glass flask. Then the flask was sealed under nitrogen after three freeze-evacuate-thaw cycles, and then placed in an oil bath thermostatted at 60 °C for 4.0-12.0 h. The final polymers were obtained by pouring the reaction mixture into excess absolute ether while stirring, repeating the dissolving-precipitation three times, the polymer collected by filtration was dried in a vacuum oven at room temperature overnight, and stored at room temperature for further use.

### **Preparation of nanozymes**

All of the glasswares were washed with aqua regia (HCl:HNO<sub>3</sub> volume ratio = 3:1) and rinsed with ultrapure water. The PAM-1@AuNPs, PAM-2@AuNPs, PAM-3@AuNPs, PAM-4@AuNPs and

PAM-5@AuNPs were prepared with PAM-1, PAM-2, PAM-3, PAM-4 and PAM-5 as the reducing and capping agent, respectively (Fig. S1B). Simply, in a 20.0 mL-glass flask, 2.5 mL of HAuCl<sub>4</sub> (10.0 mM), 0.25 mL of NaOH (1.0 M) and 2.5 mL of PAM-1 or PAM-2 or PAM-3 or PAM-4 or PAM-5 (2.0 mM) aqueous solutions were added and mixed under gentle stirring at 100 °C for 10 min. The PAM-1@AuNPs or PAM-2@AuNPs or PAM-3@AuNPs or PAM-4@AuNPs or PAM-5@AuNPs solution was centrifuged to remove the larger particles at 10,000 rpm for 10 min. Finally, the PAM-1@AuNPs or PAM-2@AuNPs or PAM-3@AuNPs or PAM-4@AuNPs or PAM-5@AuNPs supernatant was collected and stored at 4 °C for further use.

### ***POD-like catalytic activity of PAM-4@AuNPs***

The POD-like catalytic activity of PAM-4@AuNPs was surveyed through the oxidation with TMB (36.0 μL, 25.0 mM) as the chromogenic peroxidase substrate by the PAM-4@AuNPs catalyst (50.0 μL) in the presence of H<sub>2</sub>O<sub>2</sub> (90.0 μL, 10.0 M) with an acetate buffer solution (2.80 mL, 12.0 mM, pH 4.0). The incubation time was 15.0 min at 25 °C for the reaction mixture, followed by ultraviolet-visible (UV-vis) absorbance measurements of the solution at 650 nm.

### ***Effect of PAM chain length on the catalytic activity of the nanozymes***

The effect of PAM chain length on the catalytic activity of PAM-1@AuNPs or PAM-2@AuNPs or PAM-3@AuNPs or PAM-4@AuNPs or PAM-5@AuNPs was obtained through the oxidation with TMB (36.0 μL, 25.0 mM) by the different PAM chain length modified AuNPs based catalysts (50.0 μL) in the presence of H<sub>2</sub>O<sub>2</sub> (90.0 μL, 10.0 M) with an acetate buffer solution (2.80 mL, 12.0 mM, pH 4.0). Synthesis of PAM with different chain length (PAM-1 or PAM-2 or PAM-3 or PAM-4 or PAM-5) was controlled by different polymerization time (4.0 h, 6.0 h, 8.0 h, 10.0 h, 12.0 h) as shown in Table S1.

The molecular weight ( $M_w$ ) of PAM and its polymerization of degree (DP) in different polymerization time was calculated by monomer conversion (Table S1) as described in Ref. <sup>[1]</sup>

### ***Steady-state kinetic analysis of PAM-4@AuNPs***

The Line weaver Burk plot drawn using the Michaelis-Menten equation was examined with respect to the change in the UV-vis absorbance at 650 nm. Enzymatic kinetics was tested for studying the relationship between the initial velocity of the PAM-4@AuNPs (catalyzed reaction) and the concentrations of TMB. The typical equation for Michaelis-Menten kinetics is: <sup>[2]</sup>

$$V_0 = V_{\max} [S] / (K_m + [S]) \quad (1)$$

where  $V_0$  is the initial velocity,  $V_{\max}$  is the maximum velocity,  $K_m$  is the Michaelis-Menten constant and  $[S]$  is the concentration of the substrate.

### ***CIP detection***

CIP standard solutions (0.2-2.5 mM) were prepared. CIP solution (30.0 μL, 1.0 mM), PAM-4@AuNPs solution (50.0 μL), TMB (36.0 μL, 25.0 mM) and H<sub>2</sub>O<sub>2</sub> (90.0 μL, 10.0 M) was mixed with sodium acetate buffer solution (2.80 mL, 12.0 mM, pH 4.0). The mixture was incubated at 25 °C for 15.0 min before conducting the UV-vis absorption measurements at 650 nm.

### ***Metabolic assay of CIP in rat serum***

Three male-Sprague-Dawley-rats (about 250 g) were gotten from Beijing Vital River Laboratory Animal Technology Co. Ltd. (Beijing, China). The controlled blank serum samples and five other serum samples (at 0 h, 0.5 h, 1.5 h, 3.5 h, 5.0 h, 7.0) were collected after 13.2 mg/kg CIP dissolved in physiological saline solution was injected into the abdominal cavity of rats. The rat serum samples were pre-treated to eliminate the interferences-proteins. Simply, 0.1 mL of the fresh rat serum samples was diluted by 0.1

mL of ethanol, which was incubated at 25 °C for 10.0 min. Consequently, the samples were centrifuged at 10,000 rpm for 10 min and the supernatant was collected and stored at 4 °C for further analysis.

The proposed colorimetric PAM-4@AuNPs-TMB-H<sub>2</sub>O<sub>2</sub> system was applied to testing CIP in the rat serum samples. 30.0 μL rat serums, PAM-4@AuNPs solution (50.0 μL), TMB (36.0 μL, 25.0 mM), H<sub>2</sub>O<sub>2</sub> (90.0 μL, 10.0 M) and acetate buffer (2.80 mL, 12.0 mM, pH 4.0) were mixed. After the mixture was mixed and incubated at 25 °C for 15.0 min, the UV-*vis* absorption measurements were conducted.

## References

- [1] R. Chang, X. Wang, X. Li, H. An and J. Qin, *ACS Appl. Mater. Interfaces*, 2016, **8**, 25544-25551.
- [2] Y. Liu, D. Ding, Y. L. Zhen, and R. Guo, *Biosens. Bioelectron.* 2017, **92**, 140-146.

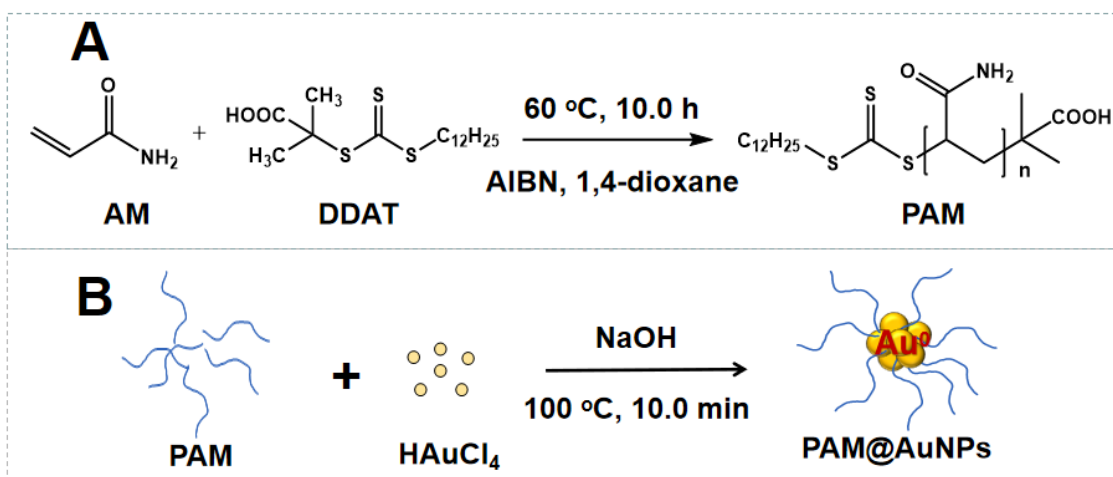

**Fig. S1.** Schematic diagram of the synthesis process of PAM (A) and PAM@AuNPs (B).

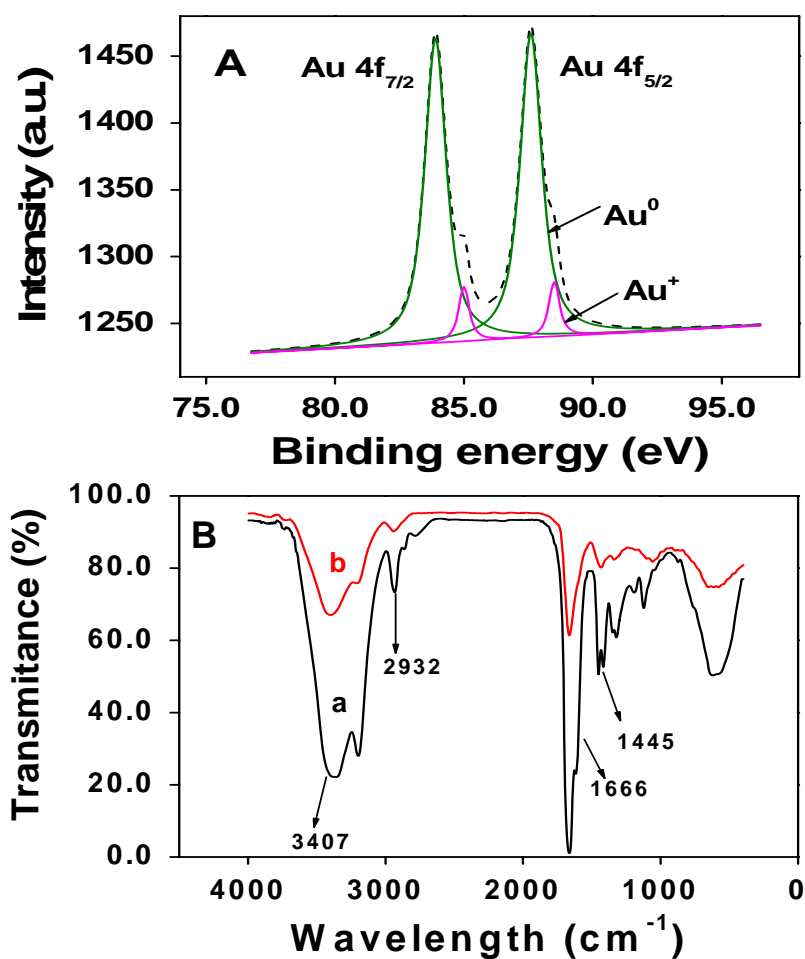

**Fig. S2.** (A) XPS spectra of Au 4f orbitals of PAM-4@AuNPs; (B) FT-IR spectra of PAM-4 (a) and PAM-4@AuNPs (b).

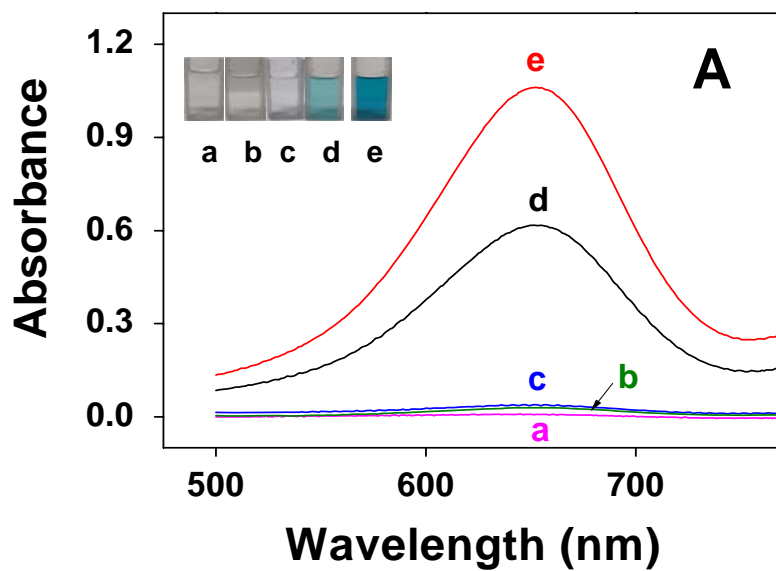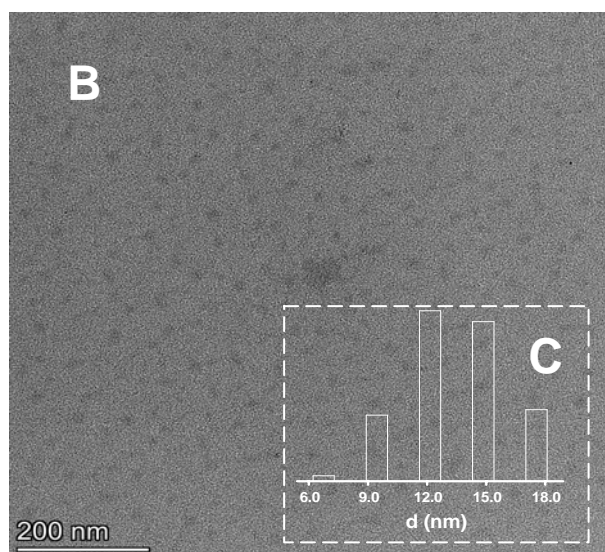

**Fig. S3.** (A) The UV-vis absorption spectra and photos of different systems: (a) TMB-H<sub>2</sub>O<sub>2</sub>; (b) TMB-H<sub>2</sub>O<sub>2</sub>-PAM; (c) TMB-H<sub>2</sub>O<sub>2</sub>-CIP; (d) PAM-4@AuNPs-TMB-H<sub>2</sub>O<sub>2</sub>; (e) PAM-4@AuNP-TMB-H<sub>2</sub>O<sub>2</sub>-CIP. (B) TEM image and (C) size distribution of PAM-4@AuNPs-CIP.

**Table S1.** The  $M_w$  and DP of PAMs prepared in different polymerization time

| PAMs  | Polymerization time (h) | Yield (g) | $M_w$ ( $10^4$ g mol $^{-1}$ ) | DP  |
|-------|-------------------------|-----------|--------------------------------|-----|
| PAM-1 | 4.0                     | 0.558     | 1.99                           | 280 |
| PAM-2 | 6.0                     | 0.602     | 2.15                           | 303 |
| PAM-3 | 8.0                     | 0.639     | 2.29                           | 322 |
| PAM-4 | 10.0                    | 0.655     | 2.35                           | 330 |
| PAM-5 | 12.0                    | 0.693     | 2.49                           | 350 |

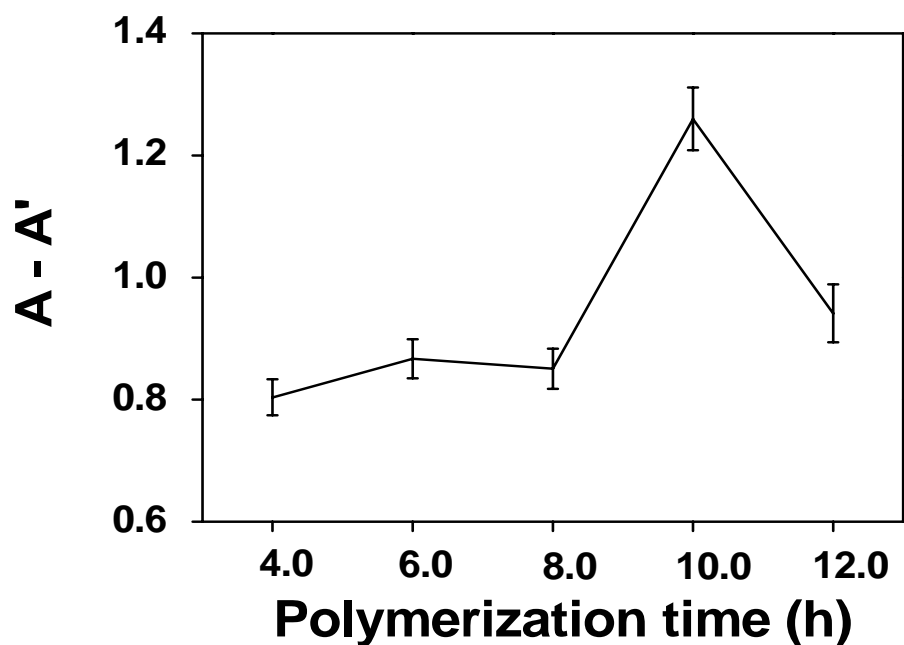

**Fig. S4.** Dependence of the POD-like activity of PAM-1@AuNPs, PAM-2@AuNPs, PAM-3@AuNPs, PAM-4@AuNPs or PAM-5@AuNPs on polymerization time of PAMs. A' and A represent the UV-vis absorption of the TMB-H<sub>2</sub>O<sub>2</sub> system in the absence and presence of the nanozymes, respectively.

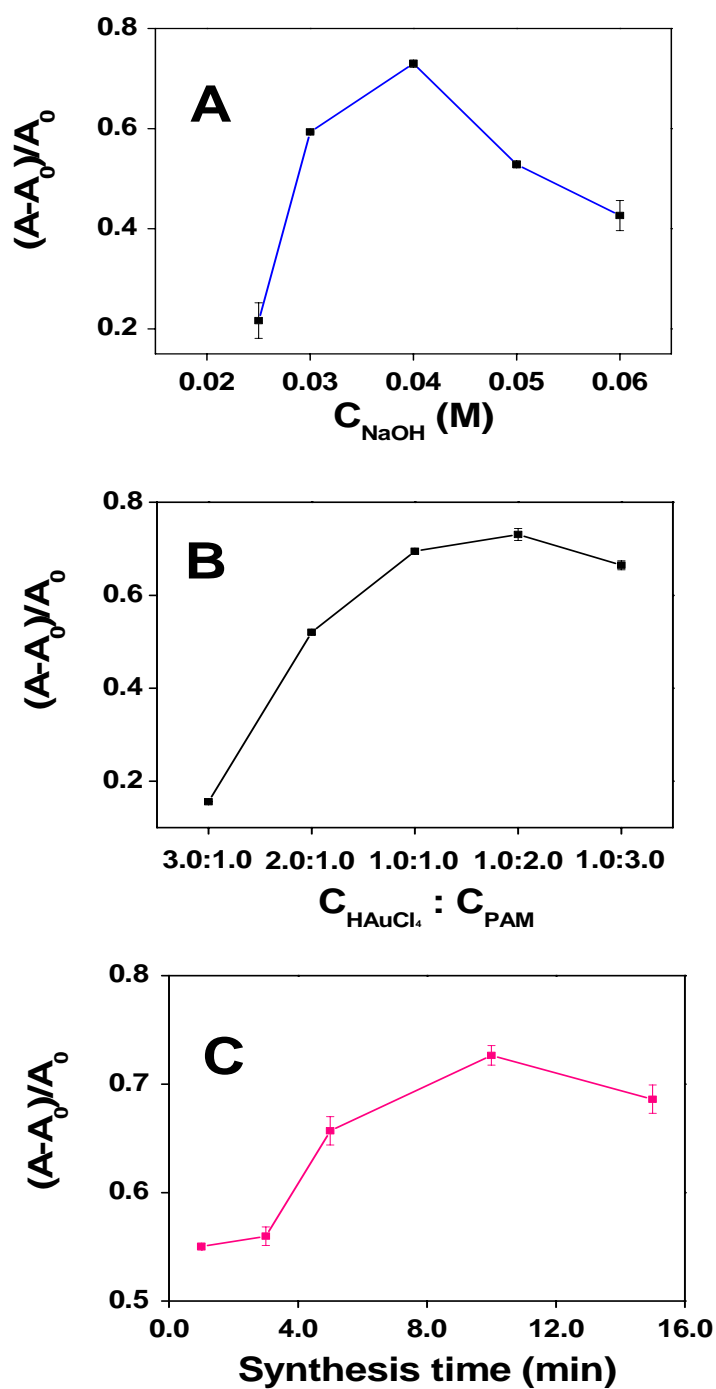

**Fig. S5.** Dependence of the POD-like activity of PAM-4@AuNPs on (A) concentration of NaOH; (B) concentration ratio of HAuCl<sub>4</sub> to PAM-4 and (C) synthesis time of PAM-4@AuNPs. A and A<sub>0</sub> represent the UV-vis absorption of the PAM-4@AuNPs-TMB-H<sub>2</sub>O<sub>2</sub> system in the presence and absence of CIP, respectively.



**Table S3.** Comparison of the polymer@AuNPs based nanocatalysts synthesis conditions

| Nanocatalysts   | Synthesis temperature (°C) | Synthesis time (h) | Reductants /stabilizers | References                                                        |
|-----------------|----------------------------|--------------------|-------------------------|-------------------------------------------------------------------|
| PANI-PSS@AuNPs  | 25                         | 24.0               | PANI-PSS/PANI-PSS       | X. Liu, et al. <i>Nanoscale</i> 2014, <b>6</b> , 5223.            |
| MMT-PANI@AuNPs  | 25                         | 24.0               | Citrate/MMT-PANI        | Y. Xia, et al. <i>RSC Adv.</i> 2014, <b>4</b> , 20516.            |
| PNIPAM@Au-AgNPs | 25                         | 0.55               | Ascorbic acid /PNIPAM   | D. Li, et al. <i>J. Nanopart. Res.</i> 2017, <b>19</b> , 377.     |
| PVP@AuNPs       | 0                          | 0.5                | Sodium borohydride /PVP | B. Agrawal, et al. <i>J. Nanopart. Res.</i> 2021, <b>23</b> , 67. |
| PAM-4@AuNPs     | 100                        | 0.17               | PAM/PAM                 | <b>This work</b>                                                  |

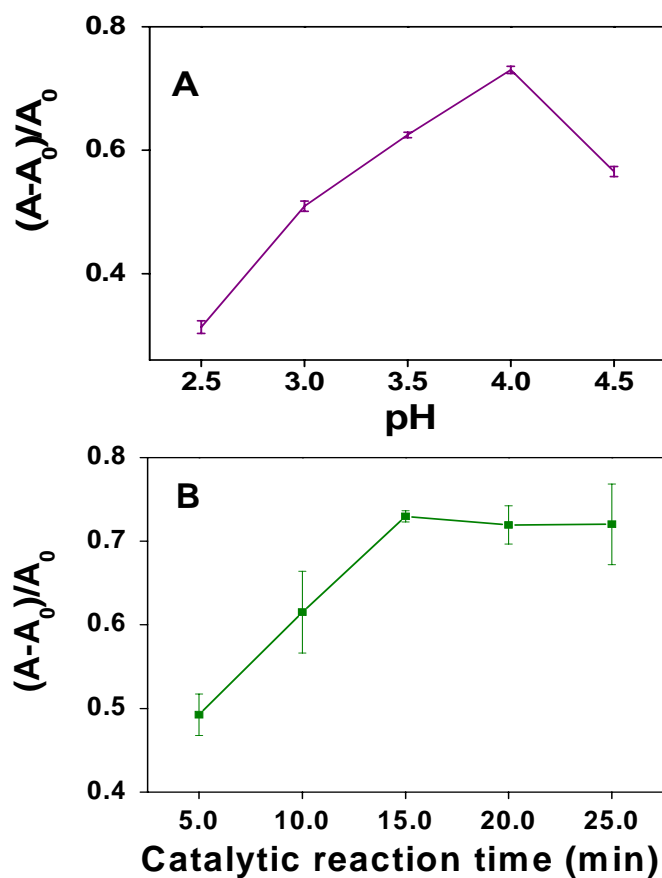

**Fig. S6.** Effect of (A) buffer pH and (B) incubation time on the POD-like activity of PAM-4@AuNPs. A and  $A_0$  represent the UV-vis absorption of the PAM-4@AuNPs-TMB- $H_2O_2$  system in the presence and absence of CIP, respectively.

**Table S3.** Kinetics of the nanozymes with TMB as the substrate

| Catalysts       | $K_m$ (mM) | $V_{max}$ ( $10^{-8}$ M·s $^{-1}$ ) |
|-----------------|------------|-------------------------------------|
| PAM-4@AuNPs     | 0.10       | 2.69                                |
| PAM-4@AuNPs-CIP | 1.95       | 5.00                                |

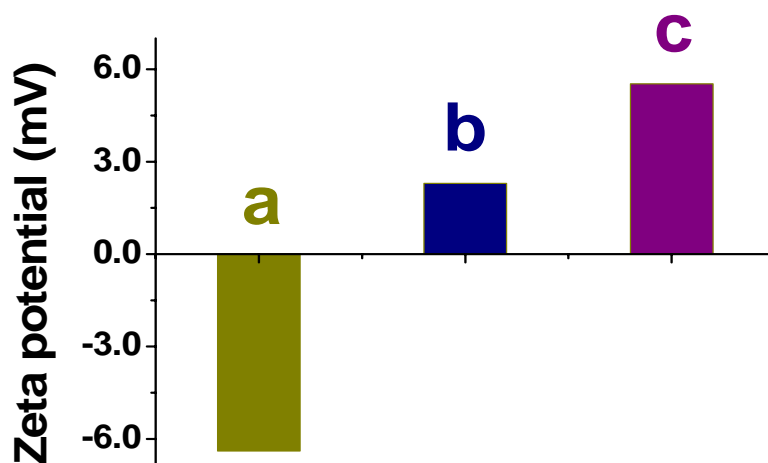

**Fig. S7.** The apparent zeta potentials of (a) PAM-4@AuNPs; (b) CIP and (c) PAM-4@AuNPs-CIP, respectively.

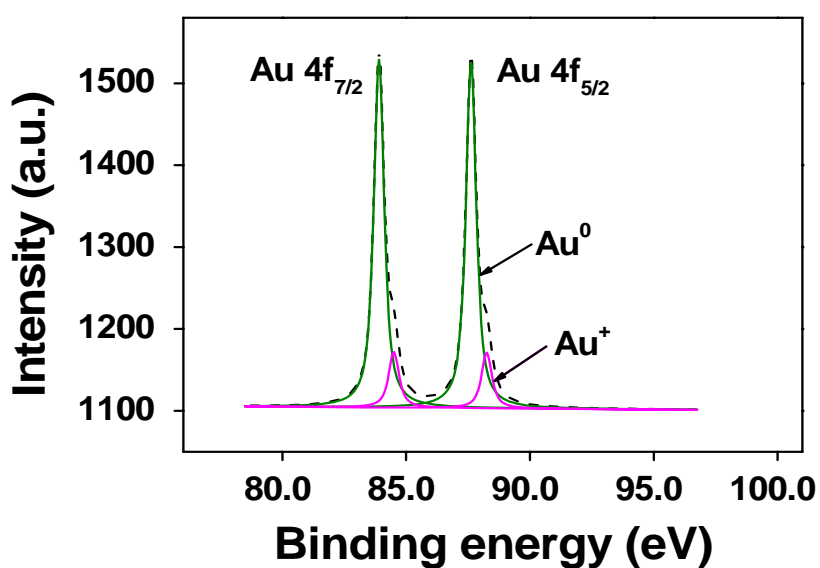

**Fig. S8.** XPS spectra of Au 4f orbitals of PAM-4@AuNPs-CIP.

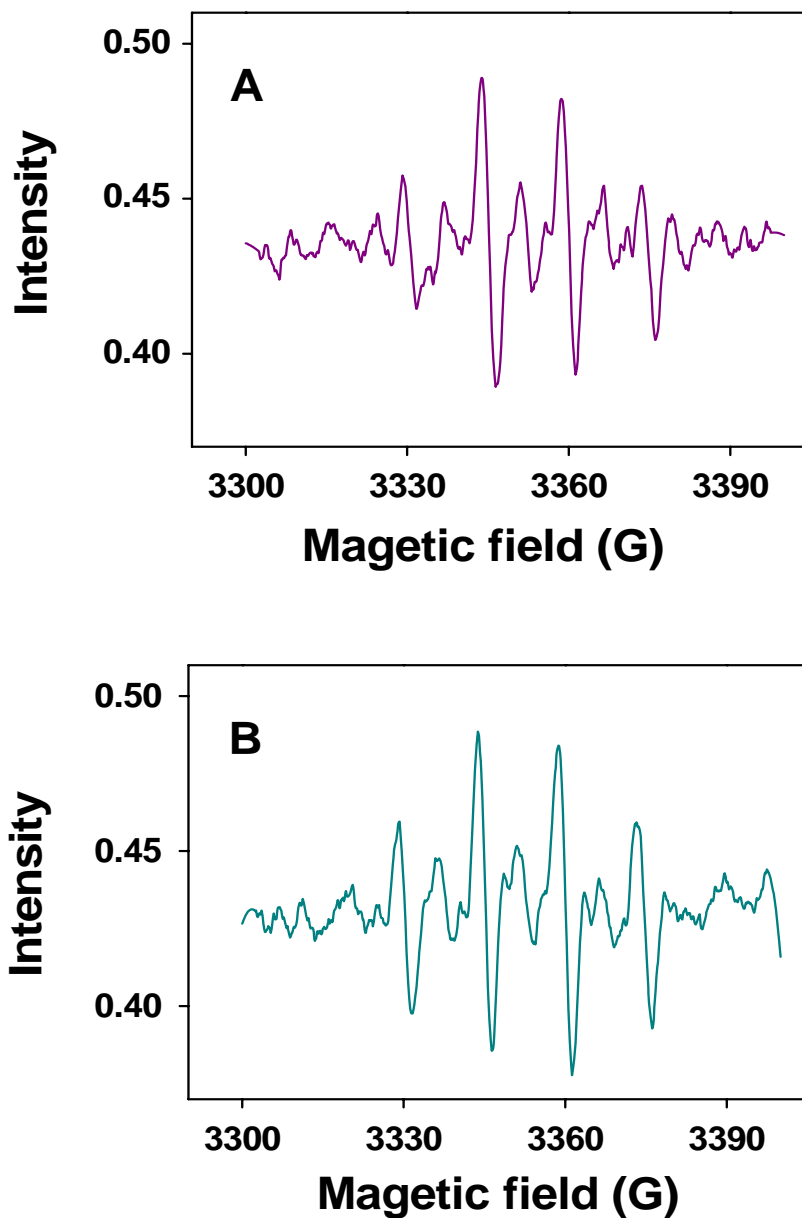

**Fig. S9.** EPR signals of (A) DMPO-H<sub>2</sub>O<sub>2</sub>-PAM-4@AuNPs and (B) DMPO-H<sub>2</sub>O<sub>2</sub>-PAM-4@AuNPs-CIP. The concentrations of DMPO, PAM-4@AuNPs, H<sub>2</sub>O<sub>2</sub> and CIP were 0.5 M, 0.1 mM, 0.3 M and 25.0  $\mu$ M, respectively.

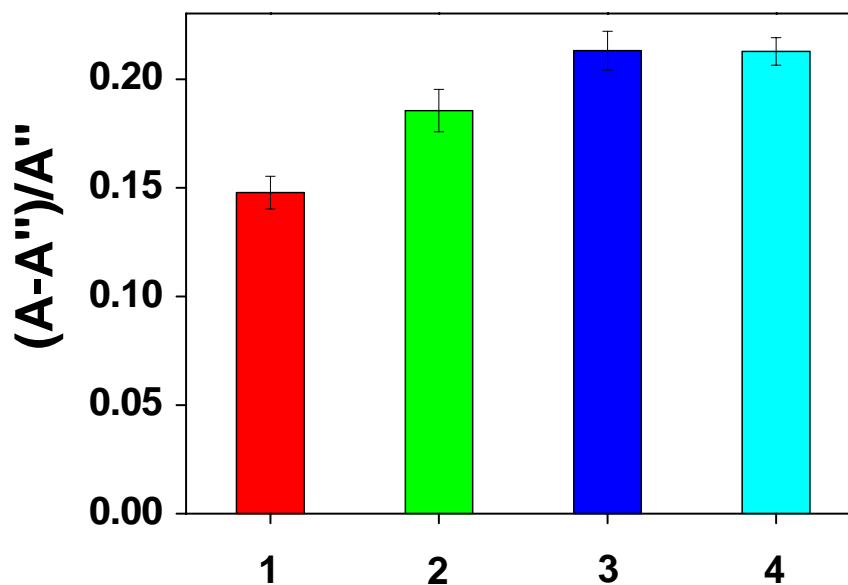

**Fig. S10.** Effect of ROS inhibitor (0.4 mM benzoquinone) on the UV-*vis* absorbance in different systems: (1) PAM-4@AuNPs-TMB-H<sub>2</sub>O<sub>2</sub>-CIP; (2) PAM-4@AuNPs-TMB-H<sub>2</sub>O<sub>2</sub>-STR; (3) PAM-4@AuNPs-TMB-H<sub>2</sub>O<sub>2</sub>-Mg<sup>2+</sup> and (4) PAM-4@AuNPs-TMB-H<sub>2</sub>O<sub>2</sub>-CTAC. A'' and A refer to the UV-*vis* absorption of the systems in the absence and presence of the benzoquinone, respectively.

**Table S4.** Recovery of the proposed method\*

| Serums | Added (μM) | Found (μM) | Recovery (%) | RSD (%) |
|--------|------------|------------|--------------|---------|
| 1      | 3.0        | 2.97       | 98.8         | 0.7     |
|        | 6.0        | 5.98       | 99.5         | 1.1     |
|        | 9.0        | 8.91       | 98.9         | 1.9     |
| 2      | 3.0        | 3.17       | 105.8        | 2.0     |
|        | 6.0        | 6.25       | 104.2        | 2.2     |
|        | 9.0        | 9.02       | 100.2        | 2.2     |
| 3      | 3.0        | 3.13       | 104.1        | 0.3     |
|        | 6.0        | 6.24       | 103.9        | 2.2     |
|        | 9.0        | 8.53       | 94.7         | 1.3     |

\* Blank controlled rat serums were used for recovery study (n=3).
